# Supplementary material for: Protocol for the Mindful Student Study: a randomised controlled trial of the provision of a mindfulness intervention to support university students' well-being and resilience to stress
Source: PubMed Central journal article supplement (PMC5129000; doi:10.1136/bmjopen-2016-012300), 2016-11-09
Supplement: bmjopen-2016-012300supp.pdf [file bmjopen-2016-012300supp.pdf]

# The Mindful Student Study

## Consent form

By agreeing to take part you **declare** that:

Tick box to confirm  
you have read each  
statement:

|                                                                                                                                                                                                                                                                                                                                                                                                                                                                           |                          |
|---------------------------------------------------------------------------------------------------------------------------------------------------------------------------------------------------------------------------------------------------------------------------------------------------------------------------------------------------------------------------------------------------------------------------------------------------------------------------|--------------------------|
| • You have read and understand the <b>Participant Information Sheet</b>                                                                                                                                                                                                                                                                                                                                                                                                   | <input type="checkbox"/> |
| • You have had the opportunity to <b>ask questions</b> and had them answered                                                                                                                                                                                                                                                                                                                                                                                              | <input type="checkbox"/> |
| • You understand that personal details will remain strictly <b>confidential</b> and will be separated from all other information so that researchers work with anonymous data.                                                                                                                                                                                                                                                                                            | <input type="checkbox"/> |
| • You understand that your participation is voluntary and that you are <b>free to withdraw</b> at any time without giving a reason.                                                                                                                                                                                                                                                                                                                                       | <input type="checkbox"/> |
| • You are a <b>student</b> at the University of Cambridge                                                                                                                                                                                                                                                                                                                                                                                                                 | <input type="checkbox"/> |
| • You are able to attend at least <b>seven sessions</b> of the 8-session mindfulness course                                                                                                                                                                                                                                                                                                                                                                               | <input type="checkbox"/> |
| • <b>You are NOT:</b> <ul style="list-style-type: none"><li>○ Currently suffering from severe periods of anxiety or depression; or</li><li>○ Experiencing severe mental illness such as hypomania or psychotic episodes; or</li><li>○ Recently bereaved or have suffered a major loss (of about six months to a year); or</li><li>○ Experiencing any other serious mental or physical health issue that would impact on your ability to engage with the course.</li></ul> | <input type="checkbox"/> |

**By giving the details below you agree to take part in this study:**

Name.....

CRSID.....

Signature.....

Date.....
